# Supplementary material for: NIR-triggered logic gate in MXene-modified perovskite resistive random access memory
Source: Royal Society of Chemistry journal article supplement (doi:10.1039/d3tc03847e), 2024-01-01
Supplement: d3tc03847e1.pdf [file d3tc03847e1.pdf]

## Supplementary Materials

### NIR-Triggered Logic Gate in MXene-Modified Perovskite Resistive Random Access Memory

Rongbin Li,<sup>a,†</sup> Yan Sun,<sup>a,†</sup> Qianyu Zhao,<sup>a</sup> Xin Hao,<sup>a</sup> Haowei Liang,<sup>a</sup> Shengang Xu,<sup>a,b</sup>  
Yingliang Liu,<sup>\*ab</sup> Xiaoman Bi,<sup>\*ab</sup> Shaokui Cao,<sup>ab</sup>

<sup>a</sup>School of Materials Science and Engineering, Zhengzhou University, Zhengzhou 450001, People's Republic of China

<sup>b</sup>Henan Key Laboratory of Advanced Nylon Materials and Application, Zhengzhou university, Zhengzhou 450001, People's Republic of China

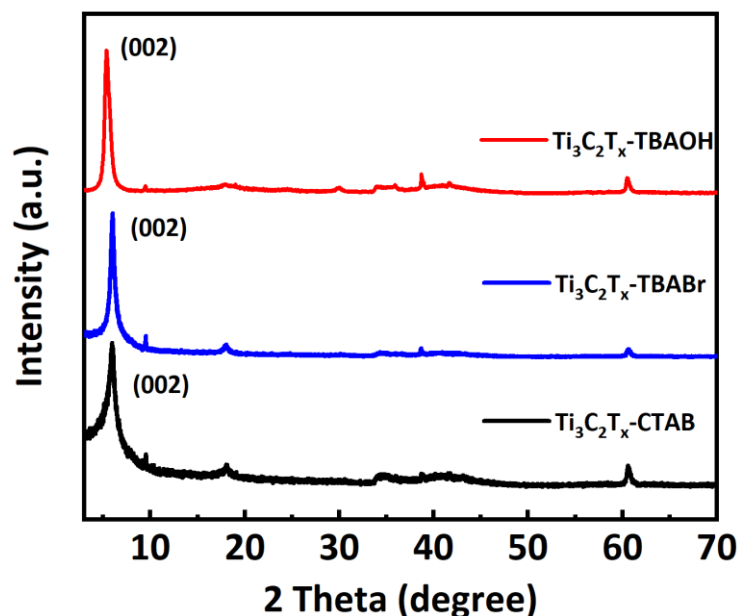

**Fig. S1** XRD patterns of Ti<sub>3</sub>C<sub>2</sub>T<sub>x</sub>-TBAOH, Ti<sub>3</sub>C<sub>2</sub>T<sub>x</sub>-TBABr, Ti<sub>3</sub>C<sub>2</sub>T<sub>x</sub>-CTAB.

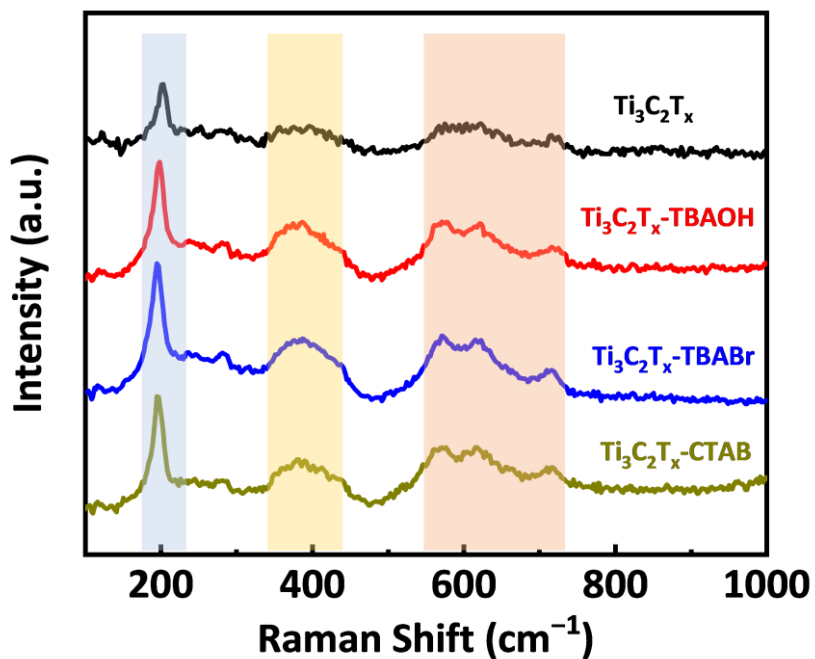

**Fig. S2** Raman spectra of  $\text{Ti}_3\text{C}_2\text{T}_x$ ,  $\text{Ti}_3\text{C}_2\text{T}_x\text{-TBAOH}$ ,  $\text{Ti}_3\text{C}_2\text{T}_x\text{-TBABr}$  and  $\text{Ti}_3\text{C}_2\text{T}_x\text{-CTAB}$ .

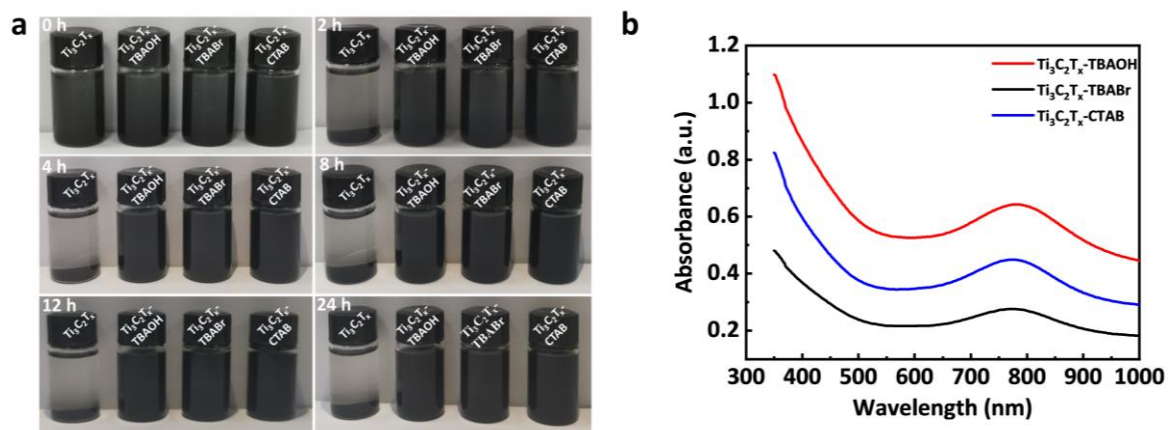

**Fig. S3** (a) Dispersibility of  $\text{Ti}_3\text{C}_2\text{T}_x\text{-TBAOH}$ ,  $\text{Ti}_3\text{C}_2\text{T}_x\text{-TBABr}$ ,  $\text{Ti}_3\text{C}_2\text{T}_x\text{-CTAB}$  in DMF; (b) The UV-vis-NIR absorption spectra after standing for 24 h.

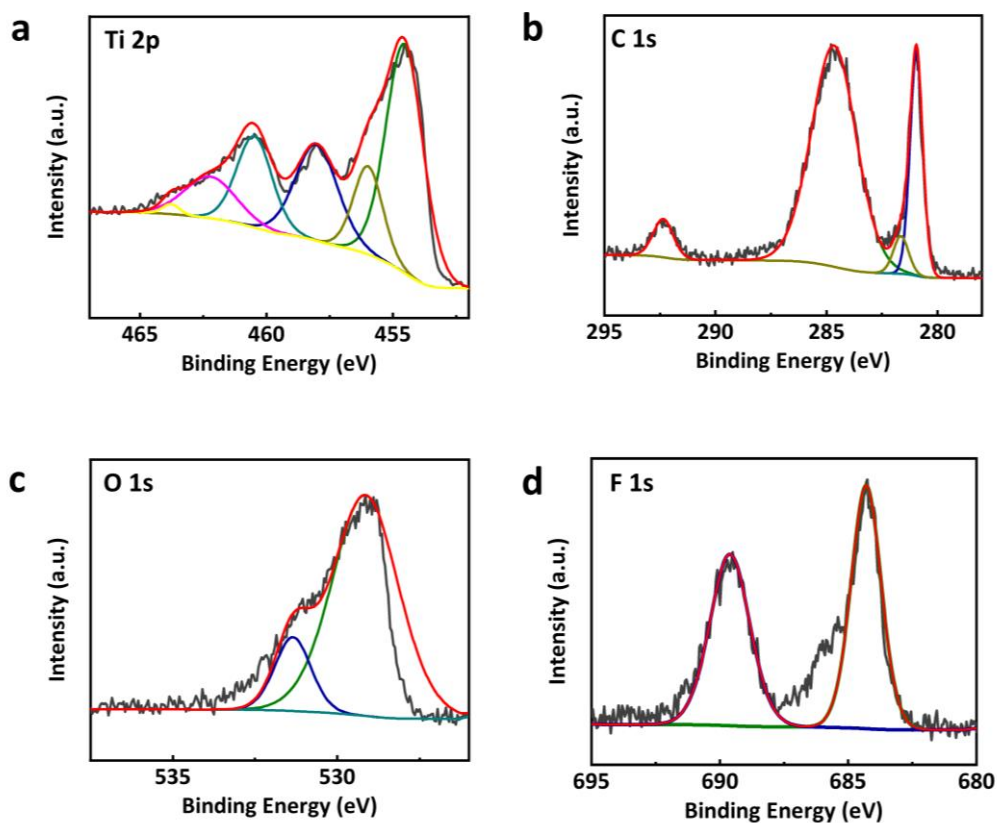

**Fig. S4** High-resolved XPS spectra of Ti2p, C1s, O1s and F1s.

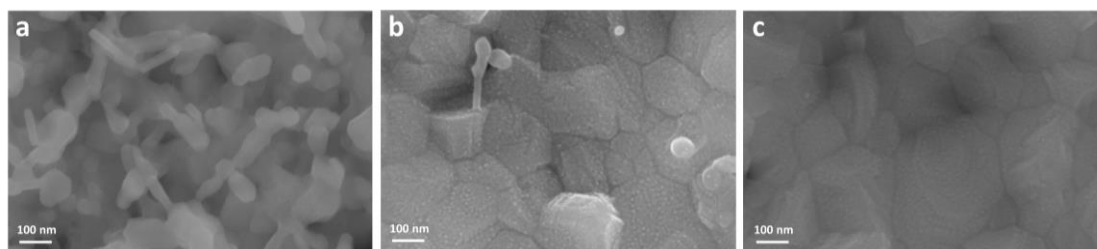

**Fig. S5** Magnified SEM images of  $\text{Ti}_3\text{C}_2\text{T}_x$ -TBAOH-modified perovskite film (a, 0wt%; b, 0.05wt%; c, 0.1wt%).

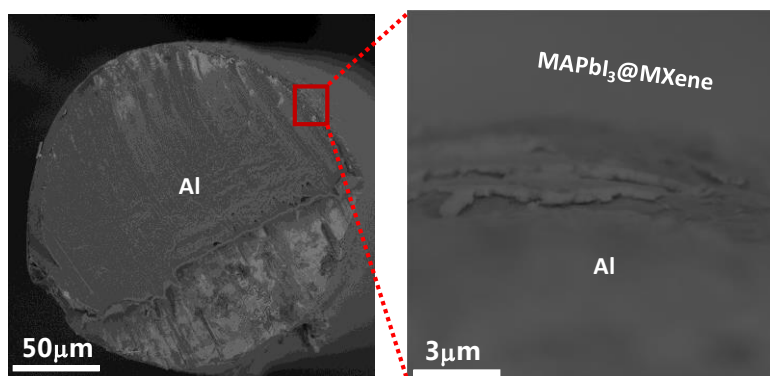

**Fig. S6** Cross-sectional SEM images of  $\text{Ti}_3\text{C}_2\text{T}_x$ -TBAOH-modified perovskite film.

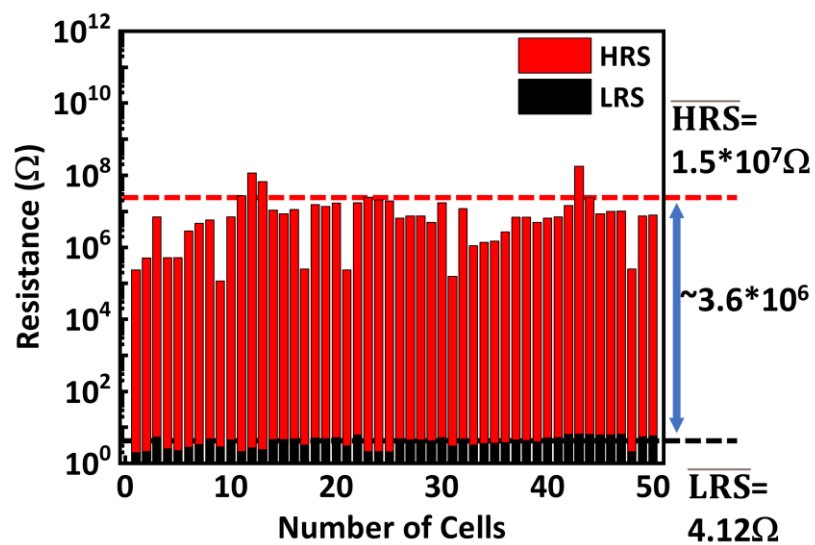

Fig. S7 HRS/LRS resistance for 50 pristine devices without the  $\text{Ti}_3\text{C}_2\text{T}_x$ -TBAOH additive.

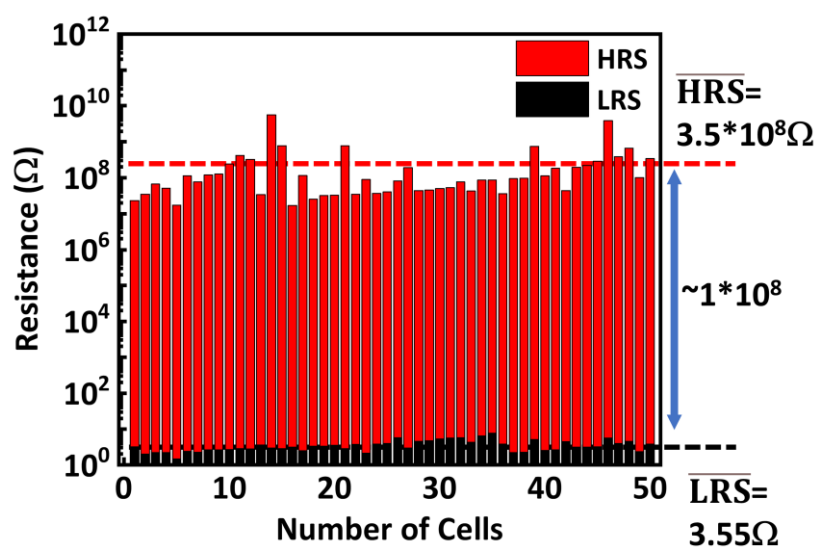

Fig. S8 HRS/LRS resistance for 50  $\text{Ti}_3\text{C}_2\text{T}_x$ -TBAOH-modified devices (0.1 wt%).

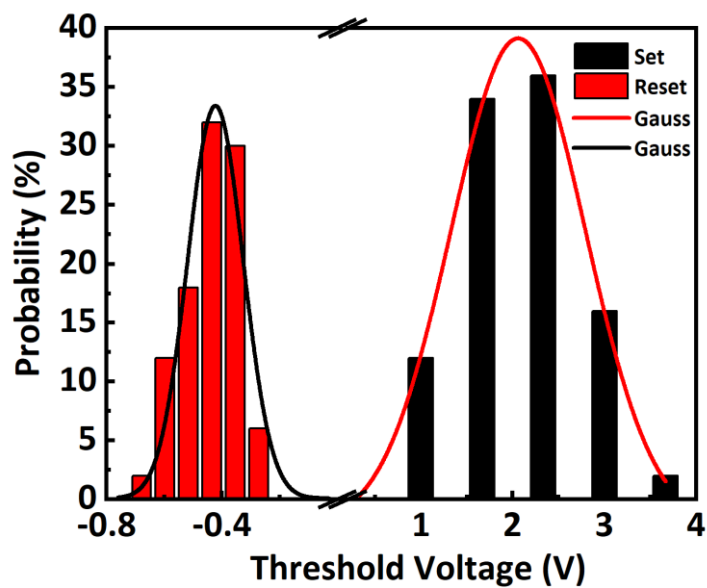

**Fig. S9** Histogram of SET/RESET voltage of pristine devices without the  $\text{Ti}_3\text{C}_2\text{T}_x$ -TBAOH additive.

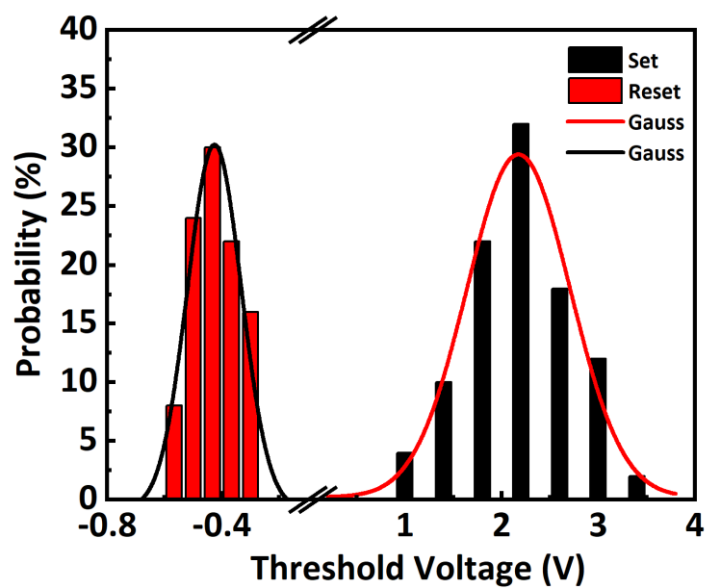

**Fig. S10** Histogram of SET/RESET voltage of  $\text{Ti}_3\text{C}_2\text{T}_x$ -TBAOH-modified devices (0.1 wt%).

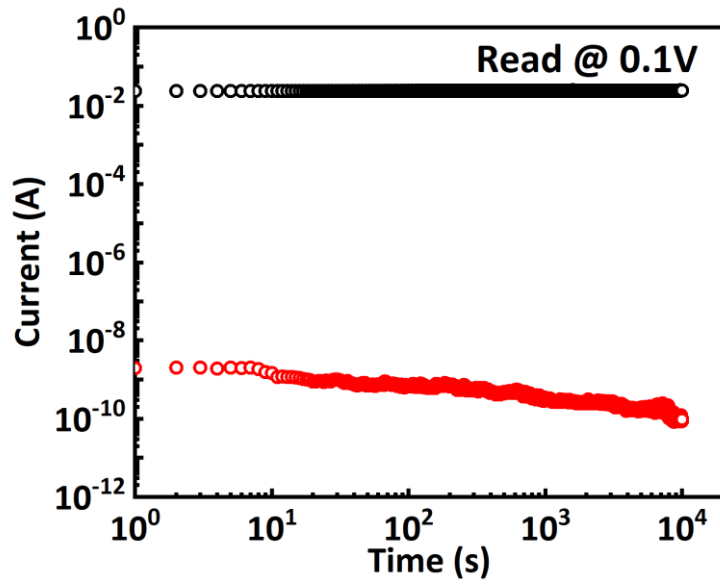

**Fig. S11** Retention characteristics of pristine devices without the  $\text{Ti}_3\text{C}_2\text{T}_x$ -TBAOH additive.

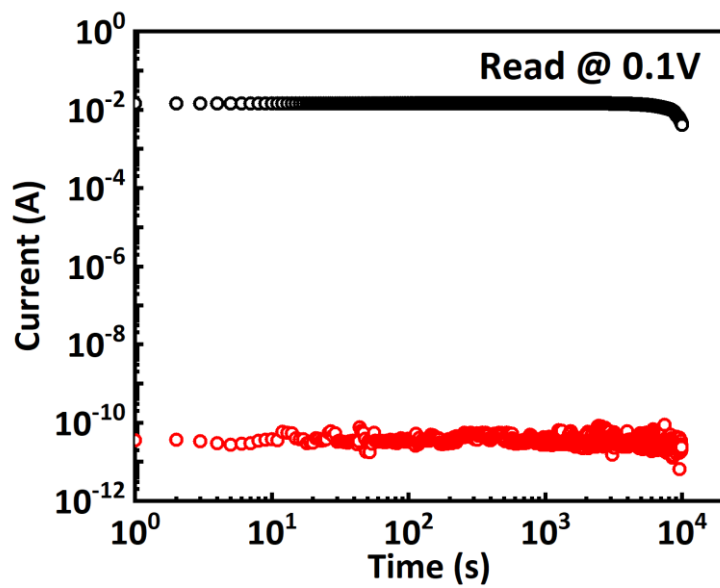

**Fig. S12** Retention characteristics of  $\text{Ti}_3\text{C}_2\text{T}_x$ -TBAOH-modified devices (0.1 wt%).

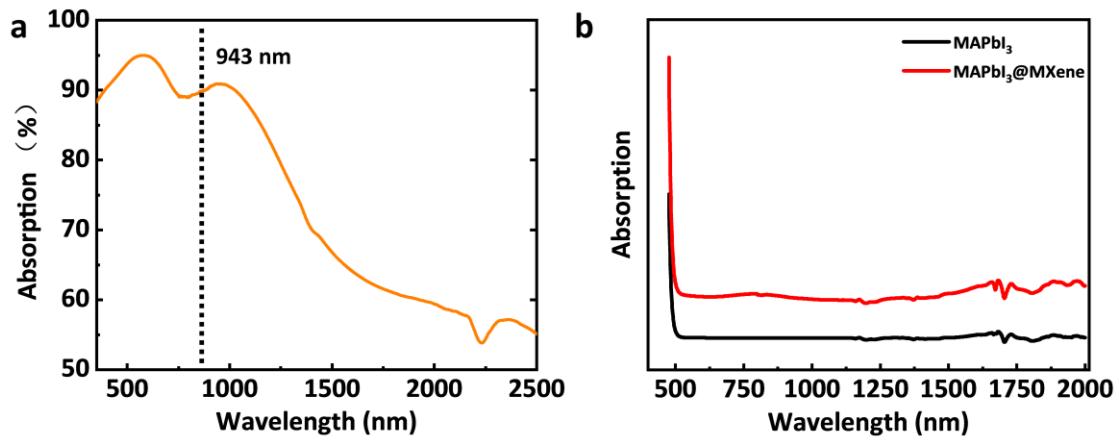

**Fig. S13** UV-vis-NIR spectra of Ti<sub>3</sub>C<sub>2</sub>T<sub>x</sub>-TBA powders (a) and MAPbI<sub>3</sub>@MXene solution (DMF: DMSO= 4: 1, b).

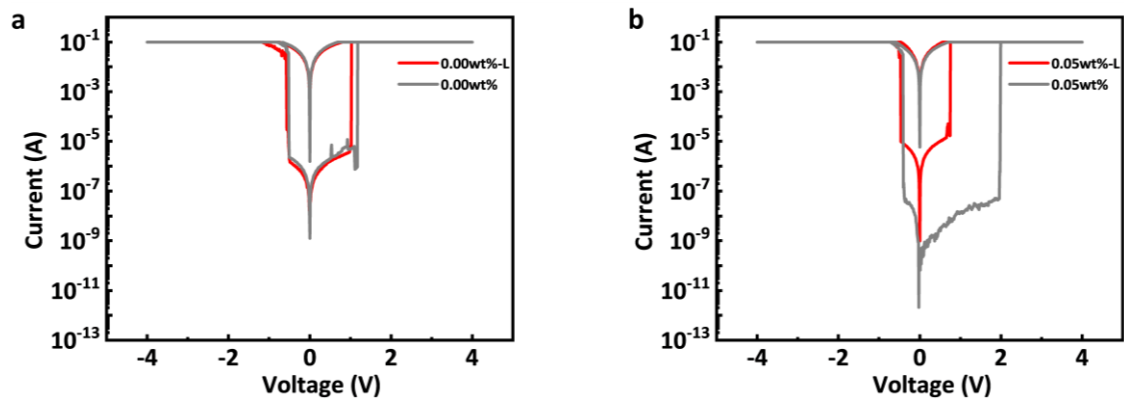

**Fig. S14** I-V curves for pristine (a) and 0.1 wt% Ti<sub>3</sub>C<sub>2</sub>T<sub>x</sub>-TBAOH-modified (b) devices in dark and under light irradiation.

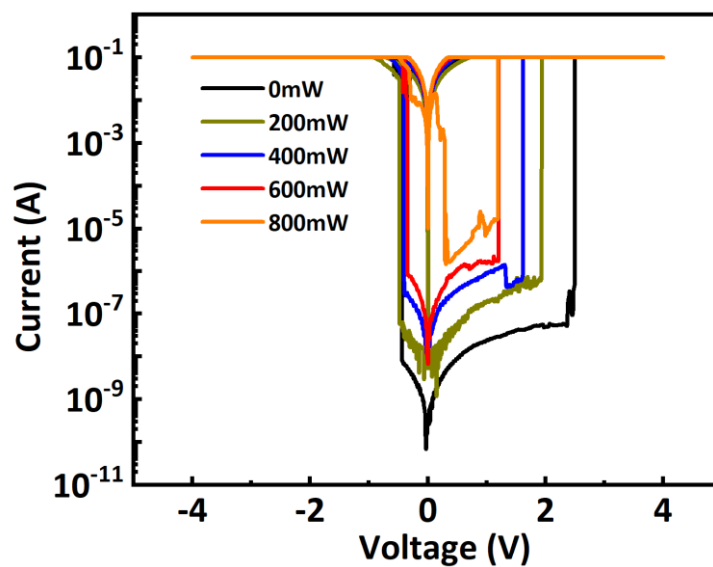

**Fig. S15** I-V curves of 0.1 wt% Ti<sub>3</sub>C<sub>2</sub>T<sub>x</sub>-TBAOH-modified RRAM device under illumination with different laser power.

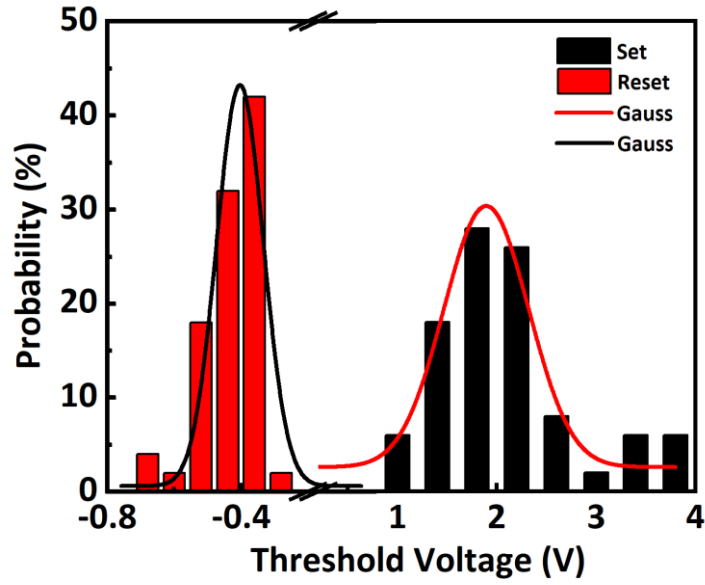

**Fig. S16** Histogram of SET/RESET voltage of pristine devices under the NIR illumination.

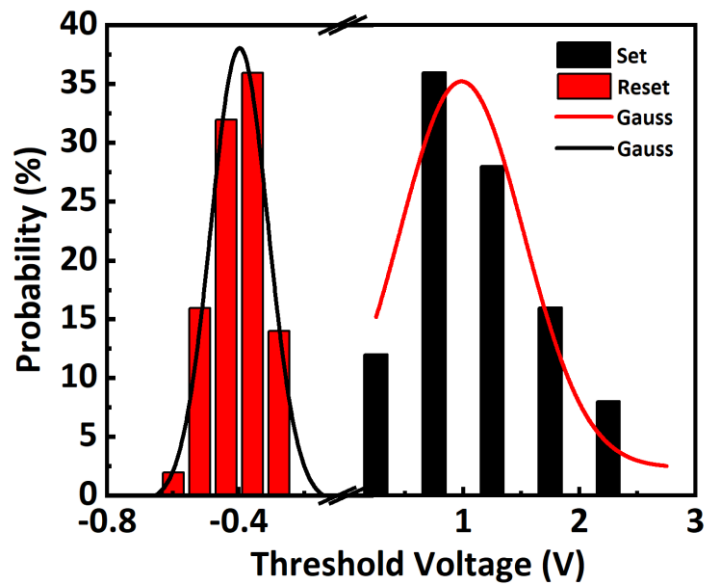

**Fig. S17** Histogram of SET/RESET voltage of 0.1wt%  $Ti_3C_2T_x$ -TBAOH-modified devices under the NIR illumination.



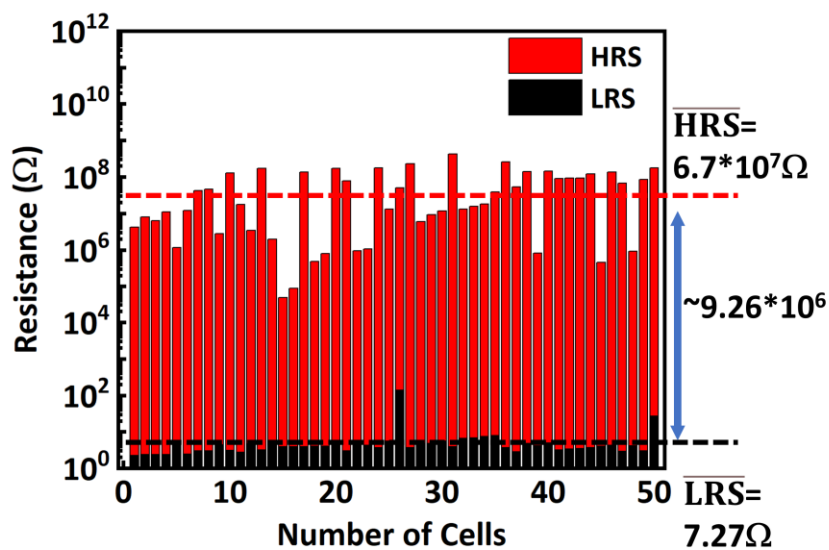

**Fig. S18** HRS/LRS resistance for 50 pristine devices under the NIR illumination.

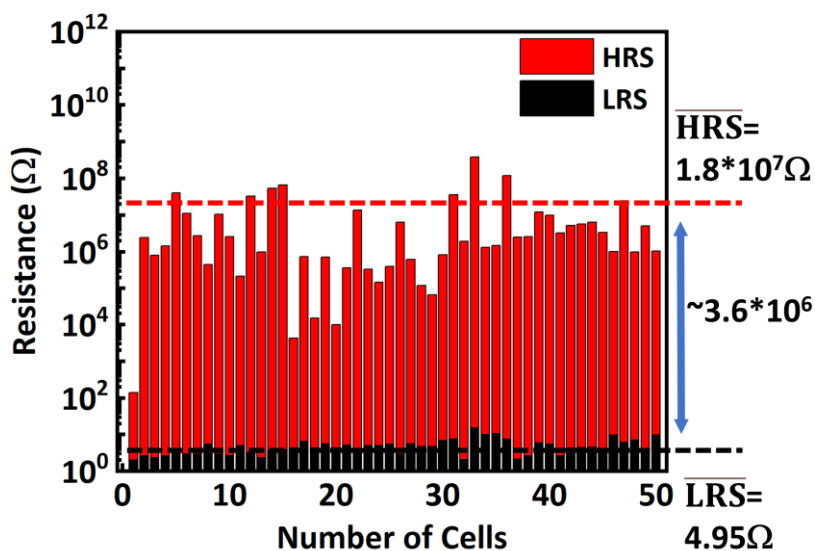

**Fig. S19** HRS/LRS resistance for 50  $\text{Ti}_3\text{C}_2\text{T}_x$ -TBAOH-modified devices (0.1 wt%) under the NIR illumination.

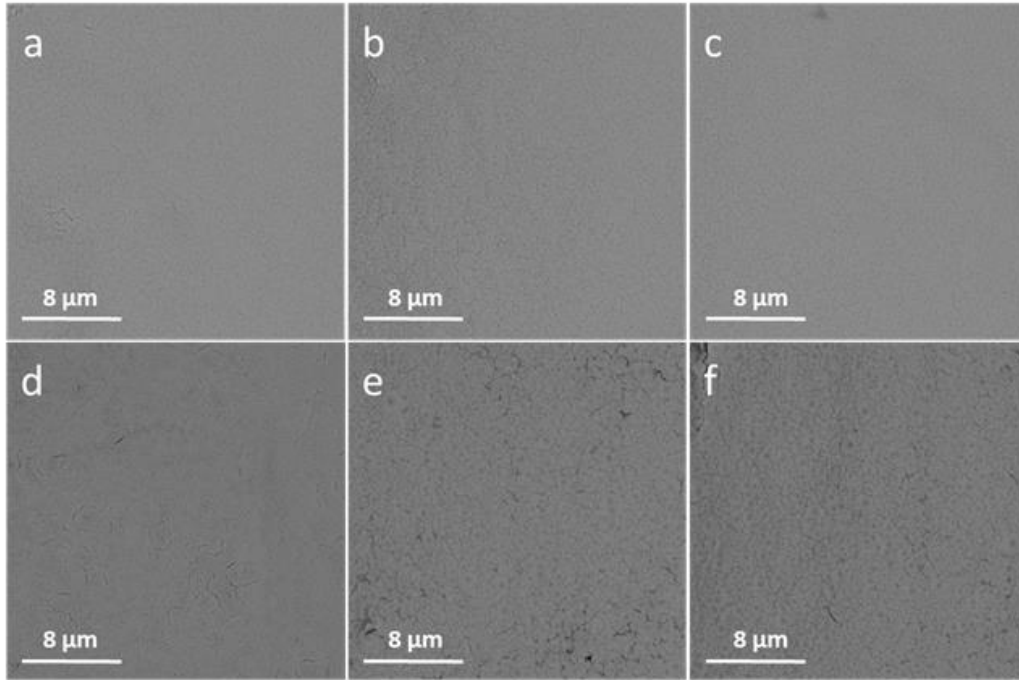

**Fig. S20** SEM images of  $\text{Ti}_3\text{C}_2\text{T}_x$ -TBAOH-modified perovskite film (a-c, before illumination; d-f, after illumination).
